# Supplementary material for: In situ single-cell activities of microbial populations revealed by spatial transcriptomics
Source: bioRxiv preprint, doi:10.1101/2021.02.24.432792, version 1 (2021-02-25)
Supplement: Supplemental Table 2 [file 432792_file04.pdf]

[illegible]



[illegible]

[illegible]

|            |     |                                |
|------------|-----|--------------------------------|
| PA14_41220 | lon | TGTTGACCTCGGCAAGTGGCTTGGTGGTGA |
| PA14_41220 | lon | TGTTGACCTCATGAGTTTCTGGTGGTGA   |
| PA14_41220 | lon | TATGATGATGAGATGACACGCGGATGTGA  |
| PA14_41220 | lon | ACCTTGGTCACTCTCTGATCGATCGGGCCC |
| PA14_41220 | lon | CGACGACGACCACTTGTCTGGGGCTCTGA  |
| PA14_41220 | lon | CGATCGAGGGGCAATTCAGACGAGTTTTC  |
| PA14_41220 | lon | TGCTGTGTGGAAGTCCGCTGCTGGTGGTGG |
| PA14_41220 | lon | CGCTCTCGGAAGCTGTGATGATGATGTAT  |
| PA14_41220 | lon | CTGTCCGAATTTCTTCAGTGTGGACAACTT |
| PA14_41220 | lon | AGATATCGGAAGTACGCTTCTTGACCTCT  |
| PA14_41220 | lon | ATTGCTGCTTTGGAATGAGGTCGGTGTTT  |
| PA14_41220 | lon | ATGTCGCGGGTACCCACCACTGCACTGAT  |
| PA14_41220 | lha | AAGCGCTGACCGCATCAGCAGAGAAATCT  |
| PA14_52270 | lha | TGGTGGAAGCATCTCGAGAAAGATATCCG  |
| PA14_52270 | lha | CGATCACTCCGACGGTCTGCTGCGAGAGT  |
| PA14_52270 | lha | TGATATGTCGCGCGGCTGCTGCTGCTGCTG |
| PA14_52270 | lha | ACCCACATCTGGGGAATGACGACGCGCT   |
| PA14_52270 | lha | TGATTAAGGATCTGTAGGCCACGAGCTCG  |
| PA14_52270 | lha | TGCTTGGCTCGGAAGCTCTCGTCTGCTGAT |
| PA14_52270 | lha | CGAAGGAGCGAGATCACTTGAAGGCGCTG  |
| PA14_52270 | lha | TCCTCTTCATAGATCGTCAGGCAGGATGT  |
| PA14_52270 | lha | AAGTGCGGCTCTTGGAATGATCGTCCGA   |
| PA14_52270 | lha | CGATGTTCTCCAGGTTGTTCTGGCGGCATC |
| PA14_52270 | lha | AGATAGCGGTACATGATCGGTACCTCGGCT |
| PA14_52270 | lha | TAGGCTGCTGCTGCTGCTGCTGCTGCTGCT |
| PA14_52270 | lha | GGGCTTTCATGAGTCTTCTTCTCTATATCG |
| PA14_52270 | lha | CGCGATCTCAGGATCTCTCTCTGATCATC  |
| PA14_52270 | lha | CTGTATCGAGATCTGCTGAGACGGGCGATC |
| PA14_52270 | lha | CTGTGAGTAACTGTGCTGATCGATCGATGA |
| PA14_52270 | lha | TCAGTCTCGGCGCATCTGCTGATACGCT   |
| PA14_52270 | lha | TGAAGTCGGTGGTTTATGCTGGCCGACGT  |
| PA14_52270 | lha | ATGTTCTGCTGTGCGTGCAGCGCGTGAA   |
| PA14_52270 | lha | AGTAACTGCTGCTGCTGCTGCTGCTGCTG  |
| PA14_52270 | lha | TGCTTCATGATCTGCTGCGGACGGCGCTG  |
| PA14_52270 | lha | GTTATCGATGACCGACGAGATGCTGCACTT |
| PA14_52270 | lha | GGTCTCCAAACTCTGTAGCATCAAGCG    |
| PA14_52270 | lha | TGAGACCATGACGCTCACTTGGCGGAA    |
| PA14_52270 | lha | GTAGACACACGACGATCTCATCGGCGCT   |
| PA14_52270 | lha | GTGCTGACGAGTGGCGGCTTGGTGCTG    |
| PA14_52270 | lha | TCGGGATGCTCGGGATGTGCTGTGAGCG   |
| PA14_52270 | lha | TGCTGTGAGTATGCTGACGACCAAGCGCT  |
| PA14_52270 | lha | CGACGACGAGAGATGCTGCTGCTGCTGCT  |
| PA14_52270 | lha | CACCCACGAGAAATGGGCTCATGATGA    |
| PA14_52270 | lha | CGACGAGGACGCTGCTGCTGGAGCGCT    |
| PA14_52270 | lha | GAATCTACGATGAGATATGGGCTTCTGCG  |
| PA14_52270 | lha | AGATACGATGACGCTGCGCGATGCTGTGA  |
| PA14_52270 | lha | TGTTGTACGCGACGATGAGGATGACGAG   |
| PA14_52270 | lha | ATGACGAGTCTGCTGATGATACACCGGCT  |
| PA14_52270 | lha | AGCGAGCTTCTCACCCAGGAGCTGCTT    |
| PA14_52270 | lha | TGCGGCTGCTGCTGCTGCTGCTGCTGCTG  |
| PA14_52270 | lha | AAGATCGCGAGGATGCTGCTGCTGCTGCT  |
| PA14_52270 | lha | CGACGAGCGCTGCTGCTGCTGCTGCTGCT  |
| PA14_52270 | lha | TGTTCTGGAATCTGCTGCTGCTGCTGCTG  |
| PA14_52270 | lha | TGCTGCTGGTCTGCTGCTGCTGCTGCTG   |
| PA14_52270 | lha | AACATCTGCTGAGACGAGCGCGATGAGT   |
| PA14_52270 | lha | TGCGAGCATGCTGACGATCTGCTGCTGCTG |
| PA14_52270 | lha | TGAGAGATGCTGCTGCTGCTGCTGCTGCTG |
| PA14_52270 | lha | AGATGAGTACGAGCATGTGTGATGCTGCT  |
| PA14_52270 | lha | CATCTGATCTGCTGCTGCTGCTGCTGCTG  |
| PA14_52270 | lha | TGTTGAAGTCTGCTGCTGCTGCTGCTGCTG |
| PA14_52270 | lha | GTATCGATCTGACGAGGAGATGATGCGCT  |
| PA14_52270 | lha | ATGATCTTGGGTTGGTGGCGGGGAGATG   |
| PA14_52270 | lha | TGAGGCTAGGAAACAGCGGCTCAGAGCTG  |
| PA14_52270 | lha | GATGATAGAGCATGTCTTCCACCCCGGCT  |
| PA14_52270 | lha | GGCGCTGTGAGGAAGATGCGGAAATCT    |
| PA14_52270 | lha | AGATTTCGATGGCTGTGAGCGGGAGCTG   |
| PA14_52270 | lha | AGCTGGTGGTCTGCTGCTGCTGCTGCTG   |
| PA14_52270 | lha | CGATGATGATGCTGCTGCTGCTGCTGCTG  |
| PA14_52270 | lha | GACGTGAGTGTCTGATCTGCTGCTGCTG   |
| PA14_52270 | lha | TGCTGATCTGCTGCTGCTGCTGCTGCTG   |
| PA14_52270 | lha | TGAGATCCGGGTGAGGCGGAGATGATGAT  |
| PA14_52270 | lha | GATGAGGAGCATGATGATCATAGATGCTG  |
| PA14_52270 | lha | TGACGATGCTCTGTAGCTGCTGTGGCTAC  |
| PA14_52270 | lha | TGACCTGTGAGGAGACGCGACGGGGACG   |
| PA14_52270 | lha | TGACGCGGAGGATCTCTGATCTGCTGCTG  |
| PA14_52270 | lha | AAATATGCTGCTGCTGCTGCTGCTGCTG   |
| PA14_52270 | lha | TAGCTGTCTACCTGATGCTGACGAGACG   |
| PA14_52270 | lha | CTGTGGAGGATGCTTACGATGTATGAGT   |
| PA14_52270 | lha | TGACGAGGAGGATGATGACCGGGTCTG    |
| PA14_52270 | lha | ATGACGCTGACATGTGTGAATCTGAGCT   |
| PA14_52270 | lha | TGATTCGGGTAAATGGCAGCTGCTGAT    |
| PA14_52270 | lha | CGATTTCGAGTCTGACGAGCGCAAGTGA   |
| PA14_52270 | lha | CTGTAGGTTTTCACGAGGACGATCTGTG   |
| PA14_52270 | lha | AGTCTGCTGATGATGCTGCTGCTGCTGCTG |
| PA14_52270 | lha | TGCTGCTGCTGCTGCTGCTGCTGCTGCTG  |
| PA14_52270 | lha | AAGCGCTCTGCTGCTGCTGCTGCTGCTG</ |

[illegible]

|              |      |                                    |
|--------------|------|------------------------------------|
| PA14_24480   | pe1a | ATCGGCAATCATCGAAGCTCTTCAGGAGGCGTTG |
| PA14_24480   | pe1a | CAGCGGAGTATCTTCCGCTTCCGACCAAGCAT   |
| PA14_24480   | pe1a | TATTCGCGCATCATCAGGTGTCTATAGAGGCCG  |
| PA14_24480   | pe1a | AGGCTTCAGGCATCGATCGATCTGCTCTGG     |
| PA14_24480   | pe1a | CAGCCGATTAACCGAGGATTTTCAGACAGCG    |
| PA14_24480   | pe1a | TGACCTGTCTCTTCAGAGTTCGTTTGGGAG     |
| PA14_24480   | pe1a | AGTTTTCATACAGTACGAGATGAGTCTGAG     |
| PA14_24480   | pe1a | TTCTTCAGATACCGACATCGAGCGCGTTG      |
| PA14_24480   | pe1a | AAAACAGATCGGCGCGGCTCTGGGAGT        |
| PA14_24480   | pe1a | TCGTGAGTGTGAAGGTGTATTCAGCGAGAC     |
| PA14_24480   | pe1a | TGGTGTGATCGCGGAGTGAGGCATCTGTAG     |
| PA14_24480   | pe1a | TGCATCACAGCGCAACGATGATCTGCCGT      |
| PA14_24480   | pe1a | TCGACAGCAAGCTTCGTTCTGGTAGAGG       |
| PA14_24480   | phz1 | TCGCGCATATGTCGGAGATCTGCGAGATG      |
| PA14_24480   | phz1 | TGACCAAGAGTCTCAGTAGGCCCTCTCTCG     |
| PA14_24480   | phz1 | AGGCTGTGCTGCGGCTTCAGGCTGATCTAC     |
| PA14_24480   | phz1 | TCGTGTTTTCGACAGGCTGGTGGGCTCTG      |
| PA14_24480   | phz1 | TCTTGCTGCTCAGAACCTCAGGCGACGAG      |
| PA14_24480   | phz1 | GATCATCGAGGTGAAGGTGTCTCTGGGCTG     |
| PA14_24480   | phz1 | TGATCTGAAGTCTATCGTTCGCGCAGAGTG     |
| PA14_24480   | phz1 | AGGAGATCATGTCGTTGGAGATCTGAGATG     |
| PA14_24480   | phz1 | TCGCACAAAGCATGTGGGCGAGGCTTAC       |
| PA14_24480   | phz1 | TGACAGTGGCGGAGAAGATCAGCGCGCTG      |
| PA14_24480   | phz1 | TTGAAGCGCGCTGTATCAAGAGATGGGG       |
| PA14_24480   | phz1 | TTGAGGCTCATGCTGGCGACAGCTCGG        |
| PA14_24480   | phz1 | AAAGTCTCTCGCTTCAGTTCGACGCGCTG      |
| PA14_24480   | phz1 | ACCATGTACAGCTGTGGAGTCTCTCGGG       |
| PA14_24480   | phz1 | TGATCTTCAGGCTGGTGGAGCAAGGCGG       |
| PA14_24480   | phz1 | AGGCGATCATGTCGTTGGAGATCTGAGATG     |
| PA14_24480   | phz1 | TGAAGTCACTGTTTGGAGTCTGAGTCTG       |
| PA14_24480   | phz1 | TCGGTAAGAAGGCTCTCGGGGCTGTAGCA      |
| PA14_24480   | phz1 | AGAGCGCTGCAATTTGGACGACGCTGCA       |
| PA14_24480   | phz1 | AACTTCGGTCAAGATTTGGACGACGACCA      |
| PA14_24480   | phz1 | ATCTCCACAGCTCATGCTGGTGTAGGCA       |
| PA14_24480   | phz1 | TGCGTGTGCTGGCGGAGATCTCTCTGGG       |
| PA14_24480   | phz1 | TGGTGTGCTGGCGGAGTCTGCTGGGCTG       |
| PA14_24480   | phz1 | TATTCCTGCGACGACGAGTGGGCTCTG        |
| PA14_24480   | phz1 | GAATCTGGAGCTCTCGGATAGGCTGCTCG      |
| PA14_24480   | phz1 | AGACAGCAATGATCTGCGCGCTGTCTCG       |
| PA14_24480   | phz1 | GTATCGTAAGTCAAGCTGCGCCATCTGAG      |
| PA14_24480   | phz1 | ATTCAGGAGATCGACGCGCGAGACGCAT       |
| PA14_24480   | phz1 | GTATGAGGAGATCGACGCGGCTGTGAAC       |
| PA14_24480   | phz1 | TGACCAAGCATAGAGCATCGGCTCGACG       |
| PA14_24480   | phz1 | TCAGATCATGCTGGTGGAGATCTGAGATG      |
| PA14_24480   | phz1 | AGACACGGAGCTGCGGCTGCTCAATTCGA      |
| PA14_24480   | phz1 | ACAACCTCGGGATGAGACGCTGACGCTG       |
| PA14_24480   | phz1 | ACAACCTCGGGATGAGACGCTGACGCTG       |
| PA14_24480   | phz1 | GATGCTCGGAAATCTGCTGAGCTGTGAT       |
| PA14_24480   | phz1 | GTATTCCTTGGTCATTTGCGGAGACGCCA      |
| PA14_24480   | phz1 | TGGCGTGAAGATTCGCGTCAACACCA         |
| PA14_24480   | phz1 | TATAGCAATCTGCTGGGATCTGGGATCT       |
| PA14_24480   | phz1 | AGGCTGTGCGGACGAGTCTGCTGAAGCTG      |
| PA14_24480   | phz1 | AGCTTCGCGCAACCTCAGGTCGGGCTG        |
| PA14_24480   | phz1 | AAAGTCACGCGCGGAATCCAGAGCGCTG       |
| PA14_24480   | phz1 | TGTGATCCCGCTCTGATCATGTGGCCA        |
| PA14_24480   | phz1 | AGCAGCATATTCGCGGTTCTCGCTGAG        |
| PA14_24480   | phz1 | AGGAGCTCAGCTCCGACAGACCATGAT        |
| PA14_24480   | phz1 | GGGACATCTTCGCGGCTGCTGCTGCTG        |
| PA14_24480   | phz1 | AGAACAGCGCTGCGGAGGAGGCGCTG         |
| PA14_24480   | phz1 | AGCAGCGGCATCATGTGGTAGATGGGCT       |
| PA14_24480   | phz1 | ATGCGCTGTGCGAGGCGCATCTTCAGCAT      |
| PA14_24480   | phz1 | TCCCGCTGCAACAGGCTGAGAGGATGTCT      |
| PA14_24480   | phz1 | AGATCTCGGATAGGCTGCGCGGCTCTG        |
| PA14_24480   | phz1 | CAGCATCATCTGAGTTCGCGCGAGTAGAT      |
| PA14_24480   | phz1 | AAACGCTCTTCAGAGGCTGCTGGGCTCT       |
| PA14_24480   | phz1 | TCTCTCTTCGCGGCTGCTGGGCTCTG         |
| PA14_24480   | phz1 | TGAGTTCGCGCTCCACTGTGGTGGAGTCT      |
| PA14_24480   | phz1 | TGGTCTTCGCGTTCGAGAGGCGTGGATCT      |
| PA14_24480   | phz1 | TGGCGCAGATGATCTTGTGGCGGCTGCT       |
| PA14_24480   | phz1 | CGGCTGAGTATGATCTGCGACGACCAAGG      |
| PA14_24480   | phz1 | GGCATAGAGATATCGATGGGTTCCGCTCAT     |
| PA14_24480   | phz1 | ACATCATGATCATGCTGAGGATCTGAGGAT     |
| PA14_24480   | phz1 | GGGACATCTTCGCGGCTGCTGCTGCTG        |
| PA14_24480   | phz1 | TTCTTGTATGCTGCGGCTGCTGCTGCTG       |
| PA14_24480   | phz1 | TTCTTGTATGCTGCGGCTGCTGCTGCTG       |
| PA14_24480   | phz1 | ACACCGGCATCATGCTGAGGATGAGGCT       |
| PA14_24480   | phz1 | ATGCGCTGTGCGAGCGACTGTCTCGCTG       |
| PA14_24480   | phz1 | TCCCGCTGCAACAGGCTGAGAGGATGTCT      |
| PA14_24480   | phz1 | AGATCTCGGATAGGCTGCGCGGCTCTG        |
| PA14_24480   | phz1 | ACATCATGATCATGCTGAGGATCTGAGGAT     |
| PA14_24480   | phz1 | GGGACATCTTCGCGGCTGCTGCTGCTG        |
| PA14_24480   | phz1 | TTCTTGTATGCTGCGGCTGCTGCTGCTG       |
| PA14_24480   | phz1 | ACACCGGCATCATGCTGAGGATGAGGCT       |
| PA14_24480   | phz1 | ATGCGCTGTGCGAGCGACTGTCTCGCTG       |
| PA14_24480   | phz1 | TCCCGCTGCAACAGGCTGAGAGGATGTCT      |
| PA14_24480</ |      |                                    |

[illegible]

[illegible]

|            |      |                                  |
|------------|------|----------------------------------|
| P414.09115 | rpoA | TTGATCGAACCATCGCAATCGATCGATGGGGG |
| P414.09115 | rpoA | TGTGTCCAGGTTGGTGCGGCTGCGCAACAG   |
| P414.09115 | rpoA | GGGTCAGCAATCATTCATACCGAAGTCGTGCA |
| P414.09115 | rpoA | AGAGTCGGCTTGTTTCAGAGTCACGAGCCAG  |
| P414.09115 | rpoA | CGGTCAGCCTTGTGCGCAGACCTTTCAGG    |
| P414.09115 | rpoA | ACCGGTCATACCGGGGACCAACACAGGAA    |
| P414.09115 | rpoA | CCGTATCGATCTGATCGATCGATCGATCGG   |
| P414.09115 | rpoA | TGTGATCGCAAGTCATCGTGGATGATCGC    |
| P414.09115 | rpoA | TGCTGTTCTGCGCTTGACGTGATCGGTGCA   |
| P414.04930 | rpoH | TGCGATCGAGTAATGCGGCTCAGGTCGTGATG |
| P414.04930 | rpoH | CCGTGACCCCGAATCTTTGGGATATATGA    |
| P414.04930 | rpoH | TGTGATCGATGACCGGCAAGCAGCAGG      |
| P414.04930 | rpoH | TGTGAACCGCTTCAGGCGCTTCTACAGGCC   |
| P414.04930 | rpoH | AGAGAAGAGCTGCGGCACATTCAGCTCTG    |
| P414.04930 | rpoH | TGCTGTTTCAACAGCAGCAGGCGCTTCTTC   |
| P414.04930 | rpoH | TGTATCTCCGCGGCTGCGGCTGCGGATG     |
| P414.04930 | rpoH | TGCGGGCAGCAACCGGAGATCGCTTTACCC   |
| P414.04930 | rpoH | TGACGATCCGGCAGCTGCGAGATGAAGCT    |
| P414.04930 | rpoH | CACAGGATGTGATACCGGTGAAGAAGTGG    |
| P414.04930 | rpoH | AGCTGTGCTTCACGCGGGCTTTCTCAACT    |
| P414.04930 | rpoH | AGAGCATCGGCTGCGCTGGCGCTTGTTGGTG  |
| P414.04930 | rpoH | AGACTTGCTCATGGCGTTTCTTTCACGTG    |
| P414.04930 | rpoH | ATCCAGAACAGCTGCGGCAACACATCTGTG   |
| P414.04930 | rpoH | TCATACATAGGCTTCAGGATTTGGCGCTGG   |
| P414.07520 | rpoD | TGCTGCTGCTTCTGCTGCTGCTGCTGCTG    |
| P414.07520 | rpoD | CGCTGCTCTCTCTTCTTCAGTGGCGGAGT    |
| P414.07520 | rpoD | TGCTCATCGGCTCGGGGCAATCGCTTTCTC   |
| P414.07520 | rpoD | TGCTGCTGGGCTCTGGTGCTGGGAGCAGG    |
| P414.07520 | rpoD | TGGGCTGCGGACCTTCTCTTGAGAGATCT    |
| P414.07520 | rpoD | ACGGACAGGTTGCATGATGGCGGCTCTCGTG  |
| P414.07520 | rpoD | TCGTCGGGGTTCTCATGAGATCGGCTCTG    |
| P414.07520 | rpoD | ATAGATCCGCTGAGAGATCGTGGAAGGCGCA  |
| P414.07520 | rpoD | TGCTGATCACTCGGCTGCTGCTGCTGCTG    |
| P414.07520 | rpoD | ACGATGATCTGTTTGGCTTTCTTCCGAGAT   |
| P414.07520 | rpoD | CGGATCTTCAGTACTCTCGGATCTTGCTCT   |
| P414.07520 | rpoD | TGCTTGCCGATGGAAATATCTCCCGGACG    |
| P414.07520 | rpoD | TGGGTGATGATGAGAATATTTGATGCCAGCA  |
| P414.07520 | rpoD | CGCGATCGGGGCTGCTCGAATAGGTTGA     |
| P414.07520 | rpoD | GAAGTCGGGTGACTGATGCTGATGCTGTC    |
| P414.07520 | rpoD | CGATCGTGCGCAGATCTGCTTGGACATGCA   |
| P414.07520 | rpoD | TGCTGCAGGCTTCAGCATCGAGTCCGAGTGA  |
| P414.07520 | rpoD | CGTCTTGCGTCACTGCTGCTGCTGCTGCTG   |
| P414.07520 | rpoD | TGCTGGATTTCTGCTTGAGATGTCCAGGTTG  |
| P414.07520 | rpoD | TTCTGAGTCGAAATAGTCCGGCGCATGTC    |
| P414.07520 | rpoD | TGCTGGTGTGTGGAATCTGGCGGCTCTG     |
| P414.07520 | rpoD | TAGTGTGTTCCGACGGCTGATACCTGGGCA   |
| P414.07520 | rpoD | TAGCTGAGGAGGAGATGATCGCTTGTCAG    |
| P414.07520 | rpoD | GGCGCTTGACATGGGATGGATTCGACGG     |
| P414.07520 | rpoD | AGCGGCGGCATCATGGGATGATGATTCGGCG  |
| P414.07520 | rpoD | CAGATCTGTGCTGCTGCTGCTGCTGCTGCTG  |
| P414.07520 | rpoD | GGGATCTTCGATAGATGATCATCTGCTGCA   |
| P414.07520 | rpoD | AGATCGATACCGACAGCGGCTTGTTCTGA    |
| P414.07520 | rpoD | AGGCATCTGAATGCCGTGTGCTCTCGATGA   |
| P414.07520 | rpoD | TGCTGCTGCTGATCTGATCTGCGAACCG     |
| P414.07520 | rpoD | CGGATTTCTGAGGATAGCATGCTTTCAT     |
| P414.07520 | rpoD | TCAAGGTTTCTGCGGCTTGTCAGGCTCTG    |
| P414.07520 | rpoD | TGCTGTGACCGGATCATCGATCGGTGTG     |
| P414.07520 | rpoD | TGCTGCTCTGCTGGGCTGCTGAGGCTTTTC   |
| P414.07520 | rpoD | TGCTCATGTTGCTGCTGCTGCTGCTGCTG    |
| P414.07520 | rpoD | ATGTCGACGACCAACGATCTGATCCGCCCC   |
| P414.07520 | rpoD | AACTGCTGGCTGGGTCAATCCGCTGTGACG   |
| P414.07520 | rpoD | CATCTCTCTGAATCCGCTCAGGTCGCTAGCA  |
| P414.07520 | rpoD | AACTCTTGCGGACATCTCTCGGAGACCTC    |
| P414.07520 | rpoD | AACAGCTGGCGATCGATACCGCGCATCAT    |
| P414.07520 | rpoD | AGAGTCGAGCATCATCATCATCGGCGCTG    |
| P414.07520 | rpoD | AAATCTTTCCGCGAGCGGCTGACGTBCCC    |
| P414.07520 | rpoD | CGAGTACGAAATGCTGCTGCTGCTGCTGCTG  |
| P414.07520 | rpoD | CTGTGCACTGAGATGCTGCTGATGATATC    |
| P414.07520 | rpoD | TCTGTAGCGACTCTGTGATGATGATCAT     |
| P414.07520 | rpoD | TCGTATAGGCGATCTCGGCGAAGACATCT    |
| P414.07520 | rpoD | CTGCTACAAATCTTCAGCATCACTCTCGG    |
| P414.07520 | rpoD | CGCATTTTGTGAAGCTGATCTCGCTTCAA    |
| P414.08910 | rpsL | TGTGTGCAAGCGGACACCACTTCTTGTGG    |
| P414.08910 | rpsL | CGAATCGATCTTGGGATGTACTTCTTGACCG  |
| P414.08910 | rpsL | GTATTCGCGATGATTTCTGGGCTGCGGTA    |
| P414.08910 | rpsL | AGGTGATACCAAGATCTGCTGCTGCTGCTG   |
| P414.08910 | rpsL | TGTTTTCGCACTCAGATGCTGGGATGATC    |
| P414.08910 | rpsL | CATCGATCTCGGCTTGGGATTTCTCTGGA    |
| P414.08910 | rpsL | CACCATCATCACTGAGATGGTGTGGTGGG    |
| P414.08910 | rpsL | GATACCATCTGTGACGGGCACTTACGCCCC   |
| P414.08910 | rpsL | CCGAGCAGACCGCTGATCTGAATCTTGATG   |
| P414.08910 | rpsL | GAATATGATCGGCTGCTGAGCGGCTTT      |
| P414.08910 | rpsL | AGGTCATCGACAGGCTTCTCAACATCTTCA   |
| P414.08910 | rpsL | CAATATGATGATGCTGCTGCTGCTGCTGCTG  |
| P414.08910 | rpsL | TGGATGCTGATGCTGCTGCTTGTAGCGGCA   |
| P414.08910 | rpsL | TTCAGAGGAGCGGGTCAAGCCGGCTTCAAG   |
| P41        |      |                                  |

|            |      |                                  |
|------------|------|----------------------------------|
| P414_03920 | uID  | TTCTCTTGTGGAGACTTCTCCAGGCTTGTCCG |
| P414_03920 | uID  | TCCTGCTTGGGAGAGGAAGTATGTGACGGCA  |
| P414_03920 | spuD | CTGCTGAGAGCTGTGAGACAGACTTGATCCC  |
| P414_03920 | spuD | TCATGACATCTCTGCTCGGTAGATAGCCCG   |
| P414_03920 | spuD | GCACCACTGACTTGGCTTCAGCACTTCGTGT  |
| P414_03920 | sUC  | AGCTTTAGGATGATTTCTTGGGAGATCTGTGG |
| P414_03920 | sUC  | AGAGTTCACAGAGAGAGAGAGAGAGTGGAG   |
| P414_03920 | sUC  | GTTCACACAGAGACAGCTGAGAGAGAGAG    |
| P414_03920 | sUC  | TCACCAAGCTTACACACGCCGCTTTACCG    |
| P414_03920 | sUC  | CTGACCTTGACCTTTGACACAGCTACCGCTG  |
| P414_03920 | sUC  | AGGCATTCACCAAGATGTTCGTGACATGGTG  |
| P414_03920 | sUC  | ATGCTCTTGCTGGATGACACAGGCTTGTGCC  |
| P414_03920 | sUC  | ATTACTCTTCGGGAGCGCTTGACAGTCTCTG  |
| P414_03920 | sUC  | GACCAAGCTGTCTACCTTGATCTCTGGAG    |
| P414_03920 | sUC  | AGGCCCTTGGATACAGAGAGCGATATTCTCA  |
| P414_03920 | sUC  | TTCTGCTGGAGAGAGAGAGAGAGAGAGAG    |
| P414_03920 | sUC  | ATCTTTCTGCAAGCTCTCTGGCGCTCTGGT   |
| P414_03920 | sUC  | GACCTTCTCGATGTCCACCGGCTCTCTGGT   |
| P414_03920 | sUC  | GCCGAGAGTACAGCTCTTCTGATCTGTGGT   |
| P414_03920 | sUC  | TCTGACCTTCCCTTCTGACGTGGGGCTCAC   |
| P414_03920 | sUC  | ATGATGGGTGACAGCTTGATCTGTCTGGCC   |
| P414_03920 | sUC  | ATCATGTGCACAGCAGACAGTCGCCGGAAG   |
| P414_03920 | sUC  | AGATCTTGGCATCCAGGACAGTACAGGTGGC  |
| P414_03920 | sUC  | TGACAGTGTCCATGATTCCTACGGTCAGCG   |
| P414_03920 | sUC  | AGGGATCTTCTGATGAGAGAGAGAGAGAG    |
| P414_03920 | sUC  | CTGGTAAATCTTCTTCTGGCGACAGTGGCG   |
| P414_03920 | sUC  | ACCTCTTCTCGAGAAATCTGTGGCTGCGGT   |
| P414_03920 | sUC  | CATGAGTAAGTGTGTGGCTGCTGTCAGCG    |
| P414_03920 | sUC  | AGCGCAATCTCCAGAGAGAGCTGTAGCGT    |
| P414_03920 | sUC  | TGCTACCTGACAGAGTAATGCGACCTTCG    |
| P414_03920 | sUC  | ATTCTGCGCACTGATCTTGGCATCTCTTC    |
| P414_03920 | sUC  | GTTCGACAGAGTACATCTCACGGGCTGTGAT  |
| P414_03920 | sUC  | CTGCTATGGTTCGATGAGAGAGAGAGAGAG   |
| P414_03920 | sUC  | TCTGACGGAGCTCTCACGGCAAGATCCGGT   |
| P414_03920 | sUC  | TGATCTGCTGTGATCGGATAGGCTCTGGAT   |
| P414_03920 | sUC  | CTGCGGAACATGTTCCAGAGATTTGTGACG   |
| P414_03920 | sUC  | AGCGGAGAAATCTGATCCACCGCTGTCGAG   |
| P414_03920 | sUC  | TGTAAAGCATTTGGTGTGTGCGCGGACGATG  |
| P414_03920 | sUC  | ACAGGCGGCTGTGAAGGAGCAAACTCAG     |
| P414_03920 | sUC  | CTGATCTACAGATACAGTACAGGACGACTG   |
| P414_03920 | sUC  | TTCCGCTTTCTTCACGGCGGATACAGAGAG   |
| P414_03920 | sUC  | CGCTCTTCTAACCTCTGAGAGAGAGAGAG    |
| P414_03920 | sUC  | CTAGAGCAATCACTGACAGCGGGGAGATCG   |
| P414_03920 | sUC  | CTGGGCAACCTTCTCCACAGCGATGACCA    |
| P414_03920 | sUC  | TGATCTCTACAGCAGCAATCCAGCAAGACT   |
| P414_03920 | sUC  | ATGCTCTCTGACAGCGGAGCTGTOTACG     |
| P414_03920 | sUC  | TACCAACGCTGTTCGAGGCTCTGAGGTTGAT  |
| P414_03920 | sUC  | TAGTGCTGCTTCTGACAGAAACGCGGACG    |
| P414_03920 | sUC  | TGTGAGGACAGAGAGTGCCTGTCTGGAG     |
| P414_03920 | sUC  | TCGATGAGTACAGAGTCTGAGAGAGAGAG    |
| P414_03920 | sUC  | TCGATGCTGCTTGGAGACTTACGCCGCA     |
| P414_03920 | sUC  | CGAATGATACGACTCTTCTCGGACATCTG    |
| P414_03920 | sUC  | TCTTGGGAGAACTGTGCTGCTTCCGCGAAG   |
| P414_03920 | sUC  | CGGTGTATCTCAAGAACACAGAGACATCTG   |
| P414_03920 | sUC  | GATGAGAGCAGCGGAGAAAGACTGTGGTAC   |
| P414_03920 | sUC  | GTGATGACCTCTTCTTGCGCCAGCTCAT     |
| P414_03920 | sUC  | ACCGTACGCCCACTCTGATCGGTGATCTG    |
| P414_03920 | sUC  | TTCTTGATGGAGAGACAGGAGATCTGCGG    |
| P414_03920 | sUC  | TCGATGCTGCTTGGAGACTTACGCCGCA     |
| P414_03920 | sUC  | AGGATATGGCCGCTCTGCTGCGCCACC      |
| P414_03920 | sUC  | TGACAGATCTACCGGATCTTCCCGGCTCT    |
| P414_03920 | sUC  | TTTCCACGAGCGGATCTGCGCGGCACTCT    |
| P414_03920 | sUC  | ATTCTCCAGCGCTGCAGCTAGGCTGTATG    |
| P414_03920 | sUC  | TGATGCTCTTGAGACAGAGAACGCTGAC     |
| P414_03920 | sUC  | ACATGTCTTCGCGACAGAGTCTGCGCAGG    |
| P414_03920 | sUC  | ATGCTTCCGCGCTGTCTGCAGTGTGTGAC    |
| P414_03920 | sUC  | TTGTGTTGGAGAGAGAGAGAGAGAGAGAG    |
| P414_03920 | sUC  | CAGATCTCTGCTTGGAGCTTCTCTCTG      |
| P414_03920 | sUC  | TCCTGGGCTGCGCTGTGATCTCTACGATA    |
| P414_03920 | sUC  | AGTCTTCCGCGAGTGTGACCGGCTCATCTG   |
| P414_03920 | sUC  | TCACGGCTGATATGGCATGTCTCCACAGC    |
| P414_03920 | sUC  | TACCGCATCATGATCCAGACAGGAGACTG    |
| P414_03920 | sUC  | CCACGTCGACAGATGTAAACCGGCTTCAT    |
| P414_03920 | sUC  | TCAGGCTCGGCTGGTTGTGAGAGCGTGTAG   |
| P414_03920 | sUC  | AGCACACTCTCCGGGATTTGTCCGATCAGC   |
| P414_03920 | sUC  | CAGTACAGCAGAGAGAGAGAGAGAGAGAG    |
| P414_03920 | sUC  | TCCTGTAGGATCTGCTGTATGATCCGCGCT   |
| P414_03920 | sUC  | TGCTGCTTGATGATCAGCGCGACGCTTCTG   |
| P414_03920 | sUC  | TCTAGGCGCGGCTGCTTGTGTGATCATGTA   |
| P414_03920 | sUC  | CACCCAGAGAGATCTGTCAGATGCTTGAT    |
| P414_03920 | sUC  | TTCTTACAGCATCTTGTGGGACAGCTGTT    |
| P414_03920 | sUC  | TGCTCGCGGTGATGTGCTGTGTCAGAGGA    |
| P414_03920 | sUC  | TGTGTCGGCTTTTACAGGCGAGCACTTCGAG  |
| P414_03920 | sUC  | TCGGTACAGCTGTGCTTCTGAGTGTGAGG    |
| P414_03920 | sUC  | CAGAGCTTTCTGCTCTGCTGGGCTGAGAT    |
| P414_03920 | sUC  | AGCTCTTCCAGTGGGGATGATCTGTCTCC    |
| P414_03920 | sUC  | GTGCGCGAAGCTCTCTCGATGTAGATTTGT   |
| P414_03920 | sUC  | ATGTTCTTCTGCTGATGTAGAGTGGCTGG    |
| P414_03920 | sUC  |                                  |
